# Supplementary material for: From isosuperatoms to isosupermolecules: new concepts in cluster science
Source: Royal Society of Chemistry journal article supplement (doi:10.1039/c6nr01998f), 2016-01-01
Supplement: c6nr01998f1.pdf [file c6nr01998f1.pdf]

Supporting Information for  
From Isosuperatoms to Isosupermolecules: New Concepts in Cluster Science

Liren Liu<sup>a</sup>, Pai Li<sup>a</sup>, Lan-Feng Yuan<sup>\*a</sup>, Longjiu Cheng<sup>b</sup>, Jinlong Yang<sup>\*a</sup>

<sup>a</sup>Hefei National Laboratory for Physical Sciences at the Microscale and Synergetic Innovation Center of Quantum Information & Quantum Physics, University of Science and Technology of China, Hefei, Anhui 230026, China.

Hefei, Anhui, 230026 (P. R. China)

E-mail: yuanlf@ustc.edu.cn; jlyang@ustc.edu.cn.

<sup>b</sup>Department of Chemistry, Anhui University

Hefei, Anhui, 230039 (P. R. China).

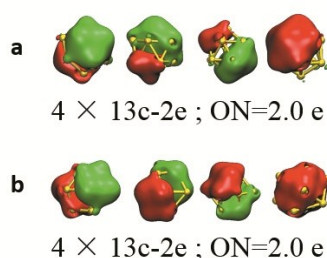

Figure S1: AdNDP localized natural bonding orbitals of two  $Au_{13}^{5+}$  clusters. (a) The  $Au_{13}$  with quasi- $I_h$  symmetry; (b) the  $Au_{13}$  with quasi- $O_h$  symmetry.

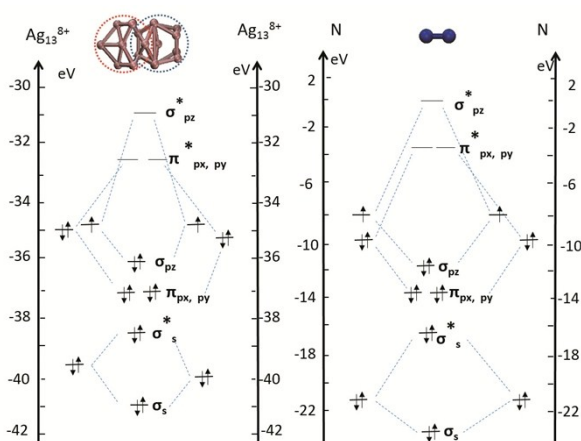

Figure S2. Schematic representation of the MO energy-level diagram for  $Ag_{22}^{12+}$  superatomic molecule (left, the energy calibration for two  $Ag_{13}^{8+}$  superatoms) and  $N_2$  molecule (right, the energy calibration for N atoms).

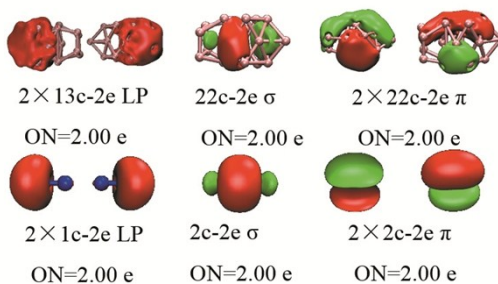

Figure S3: AdNDP localized natural bonding orbitals of  $Ag_{22}^{12+}$  and  $F_2$ .

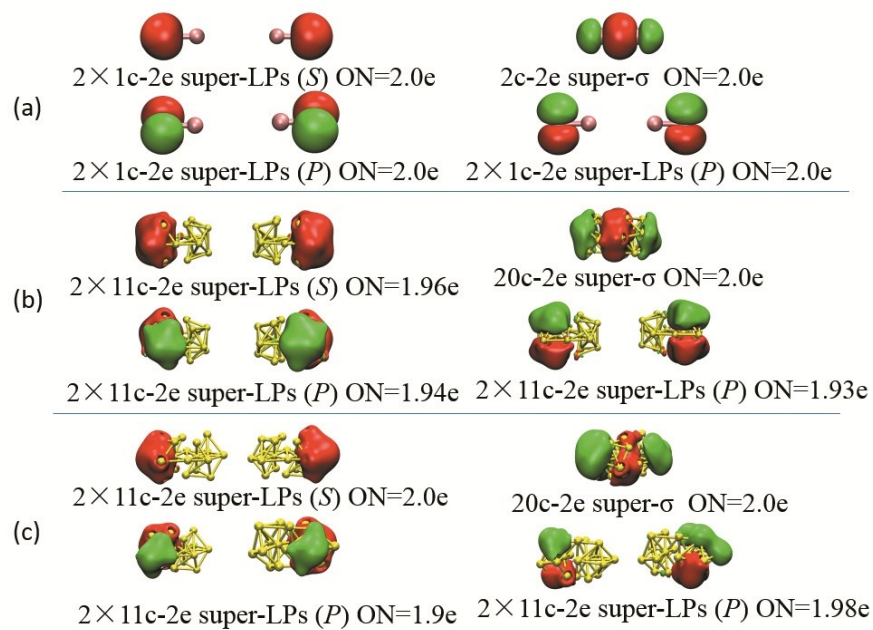

Figure S4: AdNDP localized natural bonding orbitals of  $F_2$  and  $Au_{20}^{6+}$  cores. (a)  $F_2$ , (b)  $Au_{20}^{6+}$  core of  $[Au_{20}(PPhpy)_2)_{10}Cl_4]^{2+}$ ,

(c)  $Au_{20}^{6+}$  core of  $Au_{30}S(StBu)_{18}$ .
